# Supplementary material for: Ultra Low Dose CT Pulmonary Angiography with Iterative Reconstruction
Source: PLoS One. 2016 Sep 9;11(9):e0162716. doi: 10.1371/journal.pone.0162716 (PMC5017721; doi:10.1371/journal.pone.0162716)
Supplement: S2 Table — (XLS) [file pone.0162716.s002.xls]

## Sheet: Tabelle1
Dosis-anteil	Reko	case		CNR	SNR	SER	CpNR	SpNR	SpER
0.03125	FBP	case 003	A	0.595365	1.23529	1.5931	1.15455	2.24242	1.70115
0.03125	FBP	case 009	A	0.292929	1.15909	1.35	0.853191	1.58298	2.18824
0.03125	FBP	case 024	A	0.356796	1.17718	2.07265	0.304348	1.00414	2.07265
0.03125	FBP	case 042	A	0.338211	1.17886	2.41667	-0.46789	0.71789	1.04333
0.03125	FBP	case 074	A	0.172237	0.904884	1.17333	0.0642202	0.71789	1.04333
0.03125	FBP	case 079	A	1.5249	2.03448	3.36076	2.2518	3.20863	2.82278
0.03125	FBP	case 084	A	-0.105572	0.777126	1.54971	0.201439	2.36691	1.92398
0.03125	FBP	case 087	A	0.783898	1.63983	3.83168	0.525692	1.32411	3.31683
0.03125	FBP	case 088	A	0.519097	1.03993	1.38657	0.458678	1.07851	1.20833
0.03125	FBP	case 100	A	0.959677	1.27621	2.40684	1.2004	1.51503	2.87452
0.03125	FBP	case 101	A	0.179325	0.609705	1.09886	0.301115	0.680297	1.39163
0.03125	FBP	case 102	A	0.429319	1.07853	2.26374	0.517647	1.4902	2.08791
0.03125	FBP	case 103	A	0.337278	0.731755		0.520792	0.916832
0.03125	FBP	case 105	A	0.582251	1.07143	1.49547	0.447489	0.96347	1.27492
0.03125	FBP	case 106	A	0.251092	0.823144	1.83902	0.520677	1.01316	2.62927
0.03125	FBP	case 107	A	0.515748	0.903543	17	0.501279	1.00512	14.5556			#REF!	#REF!	#REF!	#REF!	#REF!	#REF!
0.03125	iDose	case 003	B	0.551724	1.17241	1.904	0.59448	1.12951	2.128
0.03125	iDose	case 009	B	4.46269	4.71642	4.05128	5.65854	6.07317	3.19231
0.03125	iDose	case 024	B	5.90323	7.09677	10.2326	6.92453	8.32075	10.2558
0.03125	iDose	case 042	B	2.48485	2.61364	2.92373	3.65079	3.92063	2.09322
0.03125	iDose	case 074	B	5.20755	4.9434	2.22034	4.14286	3.92063	2.09322
0.03125	iDose	case 079	B	8.34043	9.89362	10.1087	5.46296	6.81481	8
0.03125	iDose	case 084	B	4.37778	4.31111	1.56452	6.37838	6.2973	1.87903
0.03125	iDose	case 087	B	8.5	9.47222	4.94203	5.8125	6.54167	4.55072
0.03125	iDose	case 088	B	3.19318	4.01136	14.7083	3.73077	5.11538	11.0833
0.03125	iDose	case 100	B	4.65625	3.65625	2.6194	3.08696	2.04348	1.40299
0.03125	iDose	case 101	B	4.57647	2.43529	1.52206	4.85714	2.49351	1.41176
0.03125	iDose	case 102	B	5.61905	4.95238	3.62791	6.70732	5.68293	2.7093
0.03125	iDose	case 103	B	2.08537	1.92683		2.50746	2.31343
0.03125	iDose	case 105	B	3.90588	3.89412	6.36538	2.71304	2.70435	5.98077
0.03125	iDose	case 106	B	3.74074	3.1358	2.46602	3.5875	2.975	2.31068
0.03125	iDose	case 107	B	5.70238	3.39286	-1.69643	6.3625	3.9375	-1.875		L3 vs. iDose 1/32	#REF!	#REF!	0.319972	#REF!	#REF!	#REF!
0.03125	L3	case 003	C	4.01235	2.83951	-2.70588	4.35	2.76667	-1.95294
0.03125	L3	case 009	C	8.21622	8.08108	4.39706	8.26087	8.04348	2.72059
0.03125	L3	case 024	C	8.23404	9.17021	17.9583	19.9444	22.3889	16.7917
0.03125	L3	case 042	C	3.9375	3.7125	2.58261	6.91892	6.43243	2.06957
0.03125	L3	case 074	C	11.1538	9.26923	2.09565	7.72973	6.40541	2.06087
0.03125	L3	case 079	C	15.96	18.28	4.8617	8.3	9.75	4.14894
0.03125	L3	case 084	C	9.45455	8.22727	1.50833	11.1429	9.85714	1.725
0.03125	L3	case 087	C	17.8333	18.8333	4.98529	9	9.58065	4.36765
0.03125	L3	case 088	C	4.53968	5.25397	15.0455	5.08108	6.2973	10.5909
0.03125	L3	case 100	C	7.33846	5.70769	2.87597	3.2987	1.92208	1.14729
0.03125	L3	case 101	C	7.48077	3.75	1.51163	10.0556	4.66667	1.30233
0.03125	L3	case 102	C	14.75	12.5	4.22535	9.0303	7.39394	3.43662
0.03125	L3	case 103	C	4.04878	3.31707		5.35484	4.3871
0.03125	L3	case 105	C	8.225	7.725	7.18605	4.10127	3.8481	7.06977
0.03125	L3	case 106	C	3.13861	2.38614	3.44286	4.16438	3.12329	3.25714
0.03125	L3	case 107	C	9.27451	5.09804	-1.30653	7.85294	4.72059	-1.61307			4.4283e-08	1.13274e-05	0.369014	6.44587e-08	6.96007e-05	0.509004
0.0625	FBP	case 003	D	0.551724	1.17241	1.904	0.59448	1.12951	2.128
0.0625	FBP	case 009	D	0.710084	1.53782	2.65217	0.890547	1.87065	2.72464
0.0625	FBP	case 024	D	1.23221	1.53933	3.288	1.01617	1.2372	3.672
0.0625	FBP	case 042	D	0.466797	1.09961	2.60648	-0.259786	0.893238	1.16204
0.0625	FBP	case 074	D	-0.189091	0.952727	1.21296	-0.0779537	0.304507	1.15741
0.0625	FBP	case 079	D	2.94776	3.61194	5.4382	3.80723	4.87952	4.55056
0.0625	FBP	case 084	D	0.357798	1.06422	1.66906	0.867925	2.32075	1.76978
0.0625	FBP	case 087	D	1.68874	2.39073	4.56962	1.40462	2.01734	4.41772
0.0625	FBP	case 088	D	0.757856	0.950092	2.79348	1.04902	1.30392	2.8913
0.0625	FBP	case 100	D	0.734411	1.24249	7.7971	0.719888	1.33613	6.91304
0.0625	FBP	case 101	D	0.0273556	0.693009	3.30435	0.251309	0.824607	4.56522
0.0625	FBP	case 102	D	0.901288	1.5279	3.3271	1.10938	2.25	2.69159
0.0625	FBP	case 103	D	0.379845	0.658915		0.415865	0.675481
0.0625	FBP	case 105	D	0.756684	1.06684	2.91241	0.983766	1.36039	3.05839
0.0625	FBP	case 106	D	0.550725	1.14493	2.02564	0.60424	1.18375	2.14744
0.0625	FBP	case 107	D	0.53951	0.99455	1.63677	0.512	1.18	1.32287			9.97319e-08	3.4061e-05	0.257883	4.56012e-08	3.01615e-05	0.431815
0.0625	iDose	case 003	E	4.91429	4.92857	5.30769	4.91071	4.92857	4.24615
0.0625	iDose	case 009	E	7	7.925	4.5942	4.46939	5.22449	3.71014
0.0625	iDose	case 024	E	10.7273	12.3939	9.29545	8.92683	10.2683	9.56818
0.0625	iDose	case 042	E	3.5618	4.4382	2.43827	3.75	5.7	1.40741
0.0625	iDose	case 074	E	6.45946	6.35135	1.45062	5.8	5.7	1.40741
0.0625	iDose	case 079	E	11.6471	13.5882	8.55556	6.70213	8.10638	7.05556
0.0625	iDose	case 084	E	4.45455	5.75758	1.58333	6.2	7.92	1.65
0.0625	iDose	case 087	E	9.6129	10.871	5.34921	6.66667	7.66667	4.74603
0.0625	iDose	case 088	E	5.23333	6.18333	5.62121	5.29787	6.51064	4.63636
0.0625	iDose	case 100	E	5.11628	4.5	3.07143	3.65094	3.15094	2.65079
0.0625	iDose	case 101	E	4.73846	2.90769	1.5	6.14286	4.01786	1.78571
0.0625	iDose	case 102	E	5.76471	5.92157	3.7284	6.79412	7.02941	2.95062
0.0625	iDose	case 103	E	2.61905	2.79365		4.21429	4.47619
0.0625	iDose	case 105	E	5.11864	5.55932	4.1519	4.70492	5.13115	3.96203
0.0625	iDose	case 106	E	4.2037	4.87037	2.92222	4.23214	4.875	3.03333
0.0625	iDose	case 107	E	6.44776	4.29851	-6.54545	6.15278	4.15278	-6.79545		L3 vs. iDose 1/16	0.0607235	0.389881	0.543342	0.0423662	0.424385	0.630304
0.0625	L3	case 003	F	10.6562	10.3125	7.5	5.40816	5.18367	5.77273
0.0625	L3	case 009	F	12.5	14.2727	4.13158	5.75676	6.81081	3.31579
0.0625	L3	case 024	F	21.5294	24.2353	10.5641	21.4118	24.1176	10.5128
0.0625	L3	case 042	F	4.42667	5.04	2.58904	7.19231	8.96154	1.59589
0.0625	L3	case 074	F	14.1111	13.0556	1.60959	9.69231	8.96154	1.59589
0.0625	L3	case 079	F	21	24.1053	6.27397	8.21951	9.65854	5.42466
0.0625	L3	case 084	F	12.4615	14.3077	1.55	24.7143	28.1429	1.64167
0.0625	L3	case 087	F	20.3333	22.4	4.94118	9.35714	10.4643	4.30882
0.0625	L3	case 088	F	-9.18182	1.72727	1.05556	0.69697	11.6061	7.09259
0.0625	L3	case 100	F	7.87273	6.76364	1.01362	4.1	3.42222	0.839237
0.0625	L3	case 101	F	8.35897	4.97436	1.41606	27.1538	17	1.61314
0.0625	L3	case 102	F	14.9	14.9	3.97333	10.0741	10.0741	3.62667
0.0625	L3	case 103	F	4.77143	4.88571		10.625	10.875
0.0625	L3	case 105	F	15.15	16.1	4.41096	6.59091	7.02273	4.23288
0.0625	L3	case 106	F	10.6364	11.9091	2.8172	10.125	11.2917	2.91398
0.0625	L3	case 107	F	15.8214	10.1786	-3.39286	8.75472	5.77358	-3.64286			3.65996e-06	5.31673e-07	0.818018	1.20236e-05	2.9334e-06	0.68617
0.125	FBP	case 003	G	0.703833	1.41115	2.64706	1.08304	1.78547	3.37255
0.125	FBP	case 009	G	1.54037	2.06211	3.56989	1.88811	2.47552	3.80645
0.125	FBP	case 024	G	2.08808	2.14508	5.67123	1.93488	1.98605	5.84932
0.125	FBP	case 042	G	0.792135	1.26124	3.80508	0.370588	1.35294	1.94915
0.125	FBP	case 074	G	0.235632	1.33333	1.9661	0.229412	1.35294	1.94915
0.125	FBP	case 079	G	4.34444	5.22222	4.31193	5.29032	6.56452	3.73394
0.125	FBP	case 084	G	1.03008	1.57143	1.83333	2.15385	3.07692	2.10526
0.125	FBP	case 087	G	3.18391	3.94253	4.83099	2.79787	3.5	4.6338
0.125	FBP	case 088	G	1.05502	1.27832	4.07216	1.04533	1.24079	4.51546
0.125	FBP	case 100	G	1.33077	1.76923	9.78723	1.89806	2.45146	10.7447
0.125	FBP	case 101	G	-0.408654	0.903846	4	0.023166	1.07722	5.93617
0.125	FBP	case 102	G	1.66897	2.1931	3.53333	1.89109	2.64356	2.96667
0.125	FBP	case 103	G	0.689956	0.895197		0.838235	1.01103
0.125	FBP	case 105	G	1.32727	1.64545	3.51456	1.18651	1.46429	3.58252
0.125	FBP	case 106	G	0.971098	1.56647	2.03759	1.15183	1.6911	2.42857
0.125	FBP	case 107	G	0.429245	1.48585	2.94393	0.316964	1.31696	2.75701			1.21307e-07	8.44575e-06	0.73397	1.76922e-09	3.98779e-07	0.383226
0.125	iDose	case 003	H	5.28333	5.81667	4.65333	6.48214	7.05357	5.26667
0.125	iDose	case 009	H	7.84848	9.24242	4.48529	4.78431	5.68627	4.26471
0.125	iDose	case 024	H	10.6857	11.4857	7.88235	9.81579	10.5526	7.86275
0.125	iDose	case 042	H	4.65079	6.22222	3.23967	3.54545	6.54545	1.78512
0.125	iDose	case 074	H	6.46667	7.46667	1.85124	5.63636	6.54545	1.78512
0.125	iDose	case 079	H	11.9118	13.5294	5.97403	6.38462	7.44231	5.02597
0.125	iDose	case 084	H	4.7931	6.44828	1.66964	6.82609	8.91304	1.83036
0.125	iDose	case 087	H	10.7037	12.3704	4.51351	9.81481	11.4815	4.18919
0.125	iDose	case 088	H	7.4	8.17778	4.71795	4.08108	4.55405	4.32051
0.125	iDose	case 100	H	6.79661	6.89831	6.16667	7.01923	7.13462	5.62121
0.125	iDose	case 101	H	4.67347	3.65306	2.71212	5.52	4.52	3.42424
0.125	iDose	case 102	H	6.56098	7.36585	3.82278	3.69492	4.25424	3.17722
0.125	iDose	case 103	H
0.125	iDose	case 105	H	5.37037	5.98148	4.25	4.32258	4.85484	3.96053
0.125	iDose	case 106	H	4.5	5.77273	2.70213	5.575	6.975	2.96809
0.125	iDose	case 107	H	6.58	5.62	7.80556	6.84783	5.80435	7.41667		L3 vs. iDose 1/8	0.0318791	0.0208045	0.284398	0.0269385	0.0212225	0.408789
0.125	L3	case 003	I	11.7778	12.7778	5.07353	10.7879	11.6061	5.63235
0.125	L3	case 009	I	13.1	15.45	4.23288	5.57778	6.62222	4.08219
0.125	L3	case 024	I	21	22.3889	8.22449	18.75	20	8.16327
0.125	L3	case 042	I	11.96	15.52	3.34483	6.04545	10.0909	1.91379
0.125	L3	case 074	I	14.5	16.0714	1.93966	9.09091	10.0909	1.91379
0.125	L3	case 079	I	21.2632	24.1053	5.14607	8.36585	9.68293	4.46067
0.125	L3	case 084	I	12.8182	16.8182	1.63717	12.1538	15.5385	1.78761
0.125	L3	case 087	I	22.6923	25.7692	4.92647	12.619	14.5238	4.48529
0.125	L3	case 088	I	9.16	10.68	3.81429	6.15556	7	4.5
0.125	L3	case 100	I	13.6897	13.8276	4.45556	8.04255	8.12766	4.24444
0.125	L3	case 101	I	11.619	8.71429	2.03333	17.2941	13.7059	2.58889
0.125	L3	case 102	I	12.8095	14.2381	4.09589	6.78378	7.59459	3.84932
0.125	L3	case 103	I	3.04082	3.63265		2.87931	3.37931
0.125	L3	case 105	I	16.2778	17.7222	4.14286	6.17778	6.75556	3.94805
0.125	L3	case 106	I	11.2222	14.0556	2.72043	11.35	13.9	2.98925
0.125	L3	case 107	I	15.1304	12.3913	11.4	11.0323	9	11.16			3.81474e-11	2.00346e-10	0.487984	4.91651e-08	2.30045e-08	0.681522
0.25	FBP	case 003	J	1.51724	2.10345	4.30588	2.24476	2.95804	4.97647
0.25	FBP	case 009	J	1.97638	2.49606	4.28378	-0.486111	0.430556	0.418919
0.25	FBP	case 024	J	3.11404	3.5	5.95522	1.92778	2.17222	5.83582
0.25	FBP	case 042	J	1.31169	1.80952	4.44681	0.964286	1.99107	2.37234
0.25	FBP	case 074	J	1.07407	1.37654	2.37234	1.55357	1.99107	2.37234
0.25	FBP	case 079	J	6.71667	7.71667	4.72449	9.07895	10.6579	4.13265
0.25	FBP	case 084	J	1.51765	2.29412	1.75676	2.84314	4.13725	1.9009
0.25	FBP	case 087	J	4.45161	5.43548	4.43421	3.90769	4.84615	4.14474
0.25	FBP	case 088	J	1.54245	1.78774	5.19178	1.85792	2.14208	5.36986
0.25	FBP	case 100	J	2.05618	2.35955	10	2.99286	3.37857	11.2619
0.25	FBP	case 101	J	0.00909091	1.56364	4.09524	0.292683	1.33537	5.21429
0.25	FBP	case 102	J	2.83333	3.58333	3.85897	3.81132	5	3.39744
0.25	FBP	case 103	J	1.15789	1.42105		1.56818	1.83333
0.25	FBP	case 105	J	2.38655	2.76471	3.65556	1.54688	1.78125	3.8
0.25	FBP	case 106	J	1.7449	2.60204	2.5	2	2.86598	2.72549
0.25	FBP	case 107	J	0.882353	2.35294	2.15385	0.878788	2.64646	2.01538			3.02931e-07	1.47072e-06	0.800815	2.17675e-05	8.70728e-05	0.808826
0.25	iDose	case 003	K	6.23913	7.58696	3.87778	7.36842	9	3.8
0.25	iDose	case 009	K	8.76667	10.2	4.43478	16.8571	19.9286	4.04348
0.25	iDose	case 024	K	12.3871	12.8387	7.80392	12.2333	12.7	7.47059
0.25	iDose	case 042	K	5.64815	7.14815	3.47748	4.1875	6.71875	1.93694
0.25	iDose	case 074	K	7.07143	7.82143	1.97297	6.0625	6.71875	1.93694
0.25	iDose	case 079	K	13.931	15.8621	6.21622	8.48718	9.92308	5.22973
0.25	iDose	case 084	K	5.65385	7.15385	1.72222	8.05	10	1.85185
0.25	iDose	case 087	K	11.4231	13	4.63014	8.28125	9.5625	4.19178
0.25	iDose	case 088	K	9.27778	10.2222	5.66154	11.4815	12.7407	5.29231
0.25	iDose	case 100	K	8.1087	8.73913	7.73077	7.26531	7.85714	7.40385
0.25	iDose	case 101	K	4.43902	4.26829	3.36538	5.79487	5.61538	4.21154
0.25	iDose	case 102	K	8.21875	9.40625	4.06757	4.84444	5.68889	3.45946
0.25	iDose	case 103	K	3.80488	4.31707		4.53659	5.04878
0.25	iDose	case 105	K	6.59091	7.25	4.62319	7.25641	8	4.52174
0.25	iDose	case 106	K	4.775	6.275	2.56122	5.39474	6.97368	2.70408
0.25	iDose	case 107	K	6.15909	6.25	8.08824	7.05263	7.15789	8		L3 vs. iDose 1/4	0.000127634	0.000273775	0.810255	0.205482	0.293505	0.978529
0.25	L3	case 003	L	16.7647	20.3529	3.88764	8.08333	9.77778	3.95506
0.25	L3	case 009	L	20.2308	23.4615	4.23611	30	35.25	3.91667
0.25	L3	case 024	L	29.7692	30.6154	8.84444	28.3846	29.2308	8.44444
0.25	L3	case 042	L	17.8235	22.5294	3.57944	7	11	2.05607
0.25	L3	case 074	L	20	22.1	2.06542	9.95	11	2.05607
0.25	L3	case 079	L	21.2632	24.2105	4.94624	11.129	12.9355	4.31183
0.25	L3	case 084	L	16.3333	20.5556	1.74528	20.125	24.875	1.87736
0.25	L3	case 087	L	22.6154	25.6923	4.77143	10.64	12.24	4.37143
0.25	L3	case 088	L	22.2667	24.4667	5.47761	14.6667	16.2381	5.08955
0.25	L3	case 100	L	17.7619	18.9524	5.85294	9.5641	10.2051	5.85294
0.25	L3	case 101	L	15.9167	14.6667	2.58824	16.7857	15.7143	3.23529
0.25	L3	case 102	L	17.7333	20.0667	4.18056	5.70455	6.5	3.97222
0.25	L3	case 103	L	17.2222	19.4444		13	14.4286
0.25	L3	case 105	L	23.9167	26.3333	4.51429	11.2308	12.3462	4.58571
0.25	L3	case 106	L	10	13.1053	2.56701	9.90476	12.7143	2.75258
0.25	L3	case 107	L	23.5833	23	13.8	12.3913	12.087	13.9			2.77612e-15	1.34505e-16	0.511672	8.73167e-07	1.13414e-06	0.501118
0.5	FBP	case 003	M	2.56731	3.34615	3.25234	5.57143	7.01786	3.6729
0.5	FBP	case 009	M	3.22785	3.91139	4.47826	4.1746	5.03175	4.5942
0.5	FBP	case 024	M	4.825	4.9375	7.45283	1.96842	2.06316	3.69811
0.5	FBP	case 042	M	2.5	3.21667	3.47748	1.76316	2.89474	1.98198
0.5	FBP	case 074	M	2.70588	3.20588	1.96396	2.44737	2.89474	1.98198
0.5	FBP	case 079	M	8.73913	10.0217	5.06593	9.13514	10.7297	4.36264
0.5	FBP	case 084	M	2.32759	3.27586	1.74312	4.36111	5.88889	1.94495
0.5	FBP	case 087	M	6.60465	7.76744	4.45333	6.82051	8.10256	4.21333
0.5	FBP	case 088	M	1.8797	2.06015	3.51282	2.4069	2.57241	4.78205
0.5	FBP	case 100	M	3.43689	3.95146	7.4	5.02564	5.70513	8.09091
0.5	FBP	case 101	M	1.28986	2.44928	3.07273	1.59036	2.55422	3.85455
0.5	FBP	case 102	M	4.64815	5.51852	4.19718	4.95349	6.04651	3.66197
0.5	FBP	case 103	M	1.79268	2.15854		2.20652	2.53261
0.5	FBP	case 105	M	3.77333	4.22667	5.19672	3.50617	3.92593	5.21311
0.5	FBP	case 106	M	2.8254	3.96825	2.77778	3.2	4.4	2.93333
0.5	FBP	case 107	M	2.69014	3.84507	5.46	2.76471	3.97059	5.4			4.4913e-05	6.39404e-05	0.519546	0.000316965	0.000654121	0.570525
0.5	iDose	case 003	N	15.6757	17.4324	7.41379	8.78788	10.7576	4.08046
0.5	iDose	case 009	N	9.13793	10.5172	4.29577	11	12.8182	3.97183
0.5	iDose	case 024	N
0.5	iDose	case 042	N	7	8.68182	3.57009	4.73333	7.2	2.01869
0.5	iDose	case 074	N	7.84615	8.38462	2.03738	6.73333	7.2	2.01869
0.5	iDose	case 079	N	15.5	17.6923	6.05263	9.76471	11.4412	5.11842
0.5	iDose	case 084	N	6.20833	7.83333	1.75701	9.22222	11.3889	1.91589
0.5	iDose	case 087	N	13.8571	15.8571	4.69014	9.88889	11.4444	4.35211
0.5	iDose	case 088	N	5.46774	5.87097	5.35294	8.77778	9.47222	5.01471
0.5	iDose	case 100	N	9.75676	10.7568	6.41935	8.15556	8.97778	6.51613
0.5	iDose	case 101	N	4.83333	5.76667	2.79032	5.55882	6.38235	3.5
0.5	iDose	case 102	N	10.75	12.375	4.36765	5.21951	6.17073	3.72059
0.5	iDose	case 103	N	4.875	5.46875		5.5	6.05882
0.5	iDose	case 105	N	8.72727	9.57576	5.35593	7.78378	8.54054	5.35593
0.5	iDose	case 106	N	6.2	8.3	2.64894	6.62069	8.7931	2.71277
0.5	iDose	case 107	N	7.6129	8.74194	38.7143	6.2973	7.24324	38.2857		L3 vs. iDose 1/2	4.93698e-08	1.39919e-08	0.449564	0.00318472	0.00400693	0.523945
0.5	L3	case 003	O	21.5385	26.3846	4.03529	13.7727	16.6364	4.30588
0.5	L3	case 009	O	20.7692	23.3846	4.22222	22.6364	25.7273	3.93056
0.5	L3	case 024	O	4.76543	4.87654	6.81034	4.13043	4.22826	6.7069
0.5	L3	case 042	O	25.6667	31.5833	3.64423	7.5	11.05	2.125
0.5	L3	case 074	O	25.5	27.375	2.10577	10.3	11.05	2.125
0.5	L3	case 079	O	21.2632	24.2632	4.85263	15.6818	18.2727	4.23158
0.5	L3	case 084	O	16.4444	20.7778	1.78095	20.5	25.375	1.93333			12.8584
0.5	L3	case 087	O	24.4167	27.8333	4.70423	12.9048	14.8571	4.39437
0.5	L3	case 088	O	24.1429	26.0714	5.36765	11.3214	12.2857	5.05882
0.5	L3	case 100	O	18.8947	20.8421	5.91045	8.95349	9.81395	6.29851
0.5	L3	case 101	O	14.5	17.3	2.58209	16.9091	19.4545	3.19403
0.5	L3	case 102	O	20.0769	22.9231	4.38235	8.03226	9.22581	4.20588
0.5	L3	case 103	O	26	29		20.8889	22.8889
0.5	L3	case 105	O	32.1111	35	5.08065	11.3077	12.3077	5.16129
0.5	L3	case 106	O	11.75	15.5625	2.56701	11.0556	14.4444	2.68041
0.5	L3	case 107	O	30	34	10.4615	9.84	1.12	1.07692			6.29727e-11	2.48104e-11	0.642592	4.70661e-07	1.39944e-05	0.739465
1	FBP	case 003	P	4	5.13636	4.52	5.86	7.36	4.90667
1	FBP	case 009	P	4.27119	5.11864	4.64615	6.07317	7.29268	4.6
1	FBP	case 024	P	6.58621	6.81034	9.40476	5.43478	5.62319	9.2381
1	FBP	case 042	P	4.01316	4.96053	3.84694	2.56604	3.92453	2.12245
1	FBP	case 074	P	4.14286	4.36735	2.18367	3.71698	3.92453	2.12245
1	FBP	case 079	P	11.1944	12.6111	4.88172	11.8966	13.6552	4.25806
1	FBP	case 084	P	3.28571	4.40476	1.83168	5.17241	6.7931	1.9505
1	FBP	case 087	P	9.03125	10.3125	4.71429	8.375	9.65625	4.41429
1	FBP	case 088	P	3.73333	4.02222	6.13559	2.89091	3.12727	5.83051
1	FBP	case 100	P	5.47619	6.28571	7.92	10.9706	12.4706	8.48
1	FBP	case 101	P	2.42857	3.4898	3.42	2.48485	3.27273	4.32
1	FBP	case 102	P	6.75676	7.94595	4.59375	7	8.375	4.1875
1	FBP	case 103	P	2.83333	3.24074		2.73134	3.0597
1	FBP	case 105	P	5.40385	5.96154	5.16667	6.08511	6.70213	5.25
1	FBP	case 106	P	4.2093	5.72093	2.7033	4.87179	6.53846	2.8022
1	FBP	case 107	P	4.22449	5.44898	6.675	4.43478	5.73913	6.6			0.00153067	0.00130136	0.430439	0.0343674	0.0330166	0.525046
1	iDose	case 003	Q	9.75	12.0714	4.63014	10.7692	13.2692	4.72603
1	iDose	case 009	Q	10.7083	12.5417	4.49254	13.2222	15.6667	4.20896
1	iDose	case 024	Q	14.1111	14.7037	9.925	21.7059	22.6471	9.625
1	iDose	case 042	Q	9.21212	11.4242	3.73267	5	7.7037	2.05941
1	iDose	case 074	Q	10	10.2381	2.12871	7.51852	7.7037	2.05941
1	iDose	case 079	Q	18.3182	20.6364	5.82051	9.82353	11.3235	4.9359
1	iDose	case 084	Q	7.75	9.7	1.90196	9.23529	11.5294	1.92157
1	iDose	case 087	Q	16.2222	18.3333	4.85294	11.5652	13.2174	4.47059
1	iDose	case 088	Q	11.0333	11.9667	6.18966	8.94118	9.76471	5.72414
1	iDose	case 100	Q	12.1034	13.5862	7.57692	9.36842	10.5	7.67308
1	iDose	case 101	Q	5.65217	7.47826	3.30769	5.7	7.1	4.09615
1	iDose	case 102	Q	12.6	14.7	4.66667	4.68182	5.63636	3.93651
1	iDose	case 103	Q	6.16	6.96		6.5	7.21429
1	iDose	case 105	Q	11.75	12.9167	5.34483	9.72414	10.6897	5.34483
1	iDose	case 106	Q	7.91304	10.6522	2.69231	8.13043	10.8696	2.74725
1	iDose	case 107	Q	9.6087	11.5652	15.6471	7.2	8.7	15.3529		L3 vs. iDose 1	8.21244e-06	3.55397e-06	0.372907	0.0406928	0.0980893	0.161158
1	L3	case 003	R	27	33.6	4.73239	13.2273	16.2273	5.02817
1	L3	case 009	R	23.3636	27.3636	4.49254	24.7	29.1	4.34328
1	L3	case 024	R	27.2143	28.2143	10.3947	46.625	48.375	10.1842
1	L3	case 042	R	30.4	37.6	3.83673	7.66667	11.6667	2.14286
1	L3	case 074	R	26.25	26.875	2.19388	11.3889	11.6667	2.14286
1	L3	case 079	R	21.2632	23.9474	4.64286	15.1304	17.3478	4.07143
1	L3	case 084	R	18	23	1.84	19.375	24.375	1.95
1	L3	case 087	R	24.5833	27.5833	4.86765	14.4211	16.3158	4.55882
1	L3	case 088	R	27.5833	30	6.31579	14.3182	15.6364	6.03509
1	L3	case 100	R	20.5294	23.1176	6.89474	13	14.5172	7.38596
1	L3	case 101	R	16.5	21.625	3.03509	15.2727	19	3.66667
1	L3	case 102	R	23.1818	26.8182	4.60938	7.67742	8.96774	4.34375
1	L3	case 103	R	25.6667	29		23	25.5				0.711437	0.992227	0.0905686	0.54248	0.853561	0.138097
1	L3	case 105	R	40.4286	44.4286	5.09836	12.5652	13.7826	5.19672			0.0469094	0.100705	0.353373	0.865796	0.803147	0.433977
1	L3	case 106	R	12.2667	16.4	2.61702	13.8571	18.2857	2.7234			6.84646e-07	1.7685e-07	0.586425	0.0407869	0.0458734	0.638997
1	L3	case 107	R	32	38.2857	9.24138	11.3	13.5	9.31034			8.21244e-06	3.55397e-06	0.372907	0.0406928	0.0980893	0.161158
ttest	CNR	SNR	SER	CpNR	SpNR	SpER					MITTELWERTE	Dosis-anteil	Reko	CNR	SNR	SER	CpNR	SpNR	SpER
L3 vs. iDose 1/32	0.00269031	0.0263887	0.96737	0.00559297	0.0580947	0.996765						0.03125	FBP	0.483285	1.10256	2.98923	0.584714	1.36422	2.80896
L3 vs. iDose 1/16	0.0103881	0.00385314	0.893188	0.01132	0.00468161	0.795318						0.0625	FBP	0.775856	1.35297	3.14249	0.868044	1.54794	3.01147
L3 vs. iDose 1/8	2.65261e-05	5.81082e-05	0.952082	0.00638176	0.00518929	0.81602						0.125	FBP	1.31138	1.91791	3.90163	1.5062	2.18692	4.02205
L3 vs. iDose 1/4	5.59445e-10	6.22804e-11	0.843553	0.00532331	0.00541426	0.761611						0.25	FBP	2.14326	2.82293	4.24899	2.31142	3.13546	3.9959
L3 vs. iDose 1/2	1.14083e-06	5.12977e-07	0.371004	0.00920035	0.00786079	0.314411						0.5	FBP	3.4896	4.24129	4.23363	3.86847	4.77068	4.02574
L3 vs. iDose 1	2.30078e-08	3.6209e-09	0.626192	0.00833582	0.00360288	0.729219						1	FBP	5.09942	5.98984	4.8429	5.66027	6.71965	4.73885
												0.03125	iDose	4.58172	4.47653	4.50399	4.51111	4.39275	3.81441
iDose vs. FPB 1/32	1.02662e-08	7.00994e-06	0.319972	2.97929e-09	4.98275e-06	0.430864						0.0625	iDose	6.1012	6.45552	3.53494	5.53848	5.92865	3.06762
iDose vs. FPB 1/16	5.14843e-09	7.27091e-07	0.708746	2.89852e-12	3.76753e-09	0.955415						0.125	iDose	6.94833	7.73673	4.42975	6.02335	6.82115	4.19322
iDose vs. FPB 1/8	2.70311e-09	1.61588e-08	0.459489	1.54311e-08	6.05988e-08	0.821919						0.25	iDose	7.65591	8.6462	4.68223	7.82211	8.97714	4.40362
iDose vs. FPB 1/4	2.38853e-07	3.46152e-07	0.560759	4.20585e-06	9.72419e-06	0.627261						0.5	iDose	8.89655	10.217	6.81902	7.60292	8.92594	6.32728
iDose vs. FPB 1/2	1.31734e-05	1.18468e-05	0.300492	1.59429e-05	2.51525e-05	0.353007						1	iDose	10.8058	12.4671	5.52731	9.31787	10.846	5.25878
iDose vs. FPB 1	5.117e-06	1.36079e-06	0.518308	0.00590016	0.00340694	0.627175						0.03125	L3	8.59985	7.75944	4.57759	7.78662	6.97398	3.80815
												0.0625	L3	11.5842	12.448	3.36356	10.617	11.2104	3.38959
L3 vs. FPB 1/32	4.4283e-08	1.13274e-05	0.369014	6.44587e-08	6.96007e-05	0.509004						0.125	L3	13.8788	15.2602	4.47916	9.56913	10.4761	4.38126
L3 vs. FPB 1/16	3.65996e-06	5.31673e-07	0.818018	1.20236e-05	2.9334e-06	0.68617						0.25	L3	19.5751	21.8471	4.87044	13.66	15.4089	4.69182
L3 vs. FPB 1/8	3.81474e-11	2.00346e-10	0.487984	4.91651e-08	2.30045e-08	0.681522						0.5	L3	21.115	24.1986	4.56716	12.96	14.2961	3.82857
L3 vs. FPB 1/4	2.77612e-15	1.34505e-16	0.511672	8.73167e-07	1.13414e-06	0.501118						1	L3	24.7644	28.6162	4.9875	16.4703	19.0165	4.87224
L3 vs. FPB 1/2	6.29727e-11	2.48104e-11	0.642592	1.45481e-05	1.39944e-05	0.739465
L3 vs. FPB 1	2.93087e-12	4.24044e-13	0.861277	0.000106947	2.93763e-05	0.87644
L3 1/16 vs. iDose 1	0.711437	0.992227	0.0905686	0.54248	0.853561	0.138097
L3 1/8 vs. iDose 1	0.0469094	0.100705	0.353373	0.865796	0.803147	0.433977					Stdabw.	Dosis-anteil	Reko	CNR	SNR	SER	CpNR	SpNR	SpER
L3 1/4 vs. iDose 1	6.84646e-07	1.7685e-07	0.586425	0.0407869	0.0458734	0.638997						0.03125	FBP	0.363516	0.34169	3.81999	0.575418	0.6798	3.21345
L3 1/2 vs. iDose 1	8.21244e-06	3.55397e-06	0.372907	0.123364	0.0980893	0.161158						0.0625	FBP	0.700737	0.705564	1.6472	0.869571	1.01404	1.5362
												0.125	FBP	1.10876	1.0956	1.88392	1.24091	1.33857	2.17685
												0.25	FBP	1.54132	1.5997	1.9129	2.08084	2.27783	2.43507
												0.5	FBP	1.8662	2.00857	1.64313	2.00237	2.31969	1.53054
												1	FBP	2.24684	2.40897	1.98944	2.7242	3.05457	2.08545
												0.03125	iDose	1.99959	2.38422	4.0918	1.74198	2.00255	3.43923
												0.0625	iDose	2.45585	3.09075	3.52532	1.35656	1.80431	3.39289
												0.125	iDose	2.31829	2.68566	1.84174	1.85797	2.0647	1.79113
												0.25	iDose	2.82379	3.07795	1.9804	3.18771	3.6014	1.92984
												0.5	iDose	3.49968	3.86169	8.99313	1.88193	2.1413	8.962
												1	iDose	3.29906	3.40993	3.37103	3.92695	3.99002	3.36786
												0.03125	L3	4.3159	4.89397	5.27032	3.87606	4.66197	4.57255
												0.0625	L3	7.36791	6.73401	3.15733	7.16106	6.44642	3.10615
												0.125	L3	4.70057	5.40088	2.43002	4.144	4.06366	2.40117
												0.25	L3	4.31235	4.16765	2.92878	6.81565	7.48721	2.94388
												0.5	L3	6.66449	7.25728	2.09181	5.94207	6.73296	1.57537
												1	L3	6.40503	6.8094	2.33524	8.98672	9.18984	2.4017
